# Supplementary material
Source: publisher site journal article supplement (https://www.dovepress.com/article/397220)
Supplement: Supplementary file 1 [file get_supplementary_file.php]

**Appendix A – International Classification of Diseases, 10th Revision**

Acute Myocardial Infarction (AMI):

I21.01, I21.02, I21.09, I21.11, I21.19, I21.21, I21.29, I21.3, I22.0, I22.1, I22.2, I22.8, I22.9, I21.4, I22.2

Cardiogenic Shock:

R57.0

| **Appendix B. Obesity Propensity Matched Population** | |  |  |  |  |
| --- | --- | --- | --- | --- | --- |
|  | **Survived** | | **Died** | | **P Value** |
| **Population** | 690 | 100.00% | 690 | 100.00% |  |
| **Age** | 67.99 | 11.02 | 67.99 | 11.02 | 1.000 |
| **Female** | 301 | 43.62% | 301 | 43.62% | 1.000 |
| **Race / Ethnicity** |  | 0.00% |  | 0.00% |  |
| White | 509 | 73.77% | 520 | 75.36% |  |
| Black | 69 | 10.00% | 74 | 10.72% |  |
| Hispanic | 78 | 11.30% | 81 | 11.74% |  |
| Asian or Pacific Islander / Native American / Other | 34 | 4.93% | 34 | 4.93% | 1.000 |
| **Payer** |  | 0.00% |  | 0.00% |  |
| Medicare | 413 | 59.86% | 448 | 64.93% |  |
| Medicaid | 58 | 8.41% | 48 | 6.96% |  |
| Private | 164 | 23.77% | 140 | 20.29% |  |
| Self-Pay | 23 | 3.33% | 32 | 4.64% |  |
| No Charge / Other | 32 | 4.64% | 21 | 3.04% | 0.050 |
| **Cardiogenic Shock** | 32 | 4.64% | 32 | 4.64% | 1.000 |
| **Comorbid Conditions** |  |  |  |  |  |
| Acquired Immune Deficiency Syndrome | <11 | NA | <11 | NA | NA |
| Alcohol Abuse | 12 | 1.74% | 14 | 2.03% | 0.844 |
| COPD | 192 | 27.83% | 175 | 25.36% | 0.330 |
| Diabetes w/ Complications | 252 | 36.52% | 332 | 48.12% | <0.001 |
| Diabetes w/ No Complications | 148 | 21.45% | 95 | 13.77% | <0.001 |
| Dementia | 22 | 3.19% | 35 | 5.07% | 0.104 |
| Depression | 99 | 14.35% | 77 | 11.16% | 0.090 |
| Drug Abuse | <11 | NA | <11 | NA |  |
| Hypertension, Complicated | 342 | 49.57% | 468 | 67.83% | <0.001 |
| Hypertension, Uncomplicated | 277 | 40.14% | 124 | 17.97% | <0.001 |
| Hypothyroidism | 99 | 14.35% | 95 | 13.77% | 0.816 |
| Other Thyroid Disorders | <11 | NA | <11 | NA |  |
| PAD | 71 | 10.29% | 87 | 12.61% | 0.205 |
| **Outcomes** |  |  |  |  |  |
| Total Cost of Visit | $26,232 | $21,758 | $44,684 | $45,190 | <0.001 |
| Length of Stay, days | 5.01 | 4.83 | 5.81 | 7.59 | 0.414 |

Appendix B provides the results of the propensity matched obese population prior to regression modeling.

| **Appendix C. Diabetes Propensity Matched Population** | | | | | |
| --- | --- | --- | --- | --- | --- |
|  | **Survived** | | **Died** | | **P Value** |
| **Population** | 1,973 | 100.00% | 1,973 | 100.00% |  |
| **Age** | 72.68 | 11.21 | 72.68 | 11.21 | 1.000 |
| **Female** | 813 | 41.21% | 813 | 41.21% | 1.000 |
| **Race / Ethnicity** |  | 0.00% |  | 0.00% |  |
| White | 1,309 | 66.35% | 1,309 | 66.35% |  |
| Black | 215 | 10.90% | 215 | 10.90% |  |
| Hispanic | 244 | 12.37% | 244 | 12.37% |  |
| Asian or Pacific Islander | 108 | 5.47% | 108 | 5.47% |  |
| Native American | 14 | 0.71% | 14 | 0.71% |  |
| Other | 83 | 4.21% | 83 | 4.21% | 1.000 |
| **Payer** |  |  |  |  |  |
| Medicare | 1,416 | 71.77% | 1,462 | 74.10% |  |
| Medicaid | 153 | 7.75% | 139 | 7.05% |  |
| Private | 294 | 14.90% | 259 | 13.13% |  |
| Self-Pay | 45 | 2.28% | 60 | 3.04% |  |
| No Charge / Other | 64 | 3.24% | 52 | 2.64% | 0.091 |
| **Cardiogenic Shock** | 131 | 6.64% | 131 | 6.64% | 1.000 |
| **Comorbid Conditions** |  |  |  |  |  |
| Acquired Immune Deficiency Syndrome | <11 | NA | <11 | NA |  |
| Alcohol Abuse | 42 | 2.13% | 37 | 1.88% | 0.650 |
| COPD | 469 | 23.77% | 446 | 22.61% | 0.407 |
| Dementia | 133 | 6.74% | 191 | 9.68% | 0.001 |
| Depression | 212 | 10.75% | 160 | 8.11% | 0.005 |
| Drug Abuse | 25 | 1.27% | 22 | 1.12% | 0.77 |
| Hypertension, Complicated | 1,198 | 60.72% | 1,420 | 71.97% | <0.001 |
| Hypertension, Uncomplicated | 625 | 31.68% | 343 | 17.38% | <0.001 |
| Hypothyroidism | 277 | 14.04% | 280 | 14.19% | 0.927 |
| Obesity | 468 | 23.72% | 430 | 21.79% | 0.160 |
| Other Thyroid Disorders | 30 | 1.52% | 21 | 1.06% | 0.259 |
| PAD | 189 | 9.58% | 244 | 12.37% | 0.006 |
| **Outcomes** |  |  |  |  |  |
| Total Cost of Visit | $26,429 | $25,738 | $37,693 | $42,650 | <0.001 |
| Length of Stay, days | 5.43 | 5.64 | 5.18 | 6.37 | <0.001 |

Appendix C provides the results of the propensity matched diabetic population prior to regression modeling.
